# Supplementary material for: Unveiling the Role Displayed by Penicillium digitatum PdMut3 Transcription Factor in Pathogen–Fruit Interaction
Source: MDPI journal article supplement (doi:10.3390/jof7100828), 2021-10-03
Supplement: s1 [file s1]

**Table S1.** Oligo sequence used in this study.

| Name   | Sequence (5'-3')               |
|--------|--------------------------------|
| Mut-1  | AGTCCTATGCAGTTAATCTCGC         |
| Mut-2  | ACAGGCATACGACCGCTTATCCA        |
| Mut-3  | GGTCTTAAUTAGAGCGGAATAGTCAAGAGG |
| Mut-4  | GGCATTAAUATTTGGGATCTGTGGTGGAG  |
| Mut-5  | GGACTTAAUAGAGCCATACTCCATCAGACG |
| Mut-6  | GGGTTTAAUTAGCCCTGCCTGGTTAGAC   |
| Mut-7  | AGTCGCGTTGGCGTTGTTATAC         |
| Mut-8  | GCCTTCATCATTCTCACTGC           |
| HygRt  | ATCGAAGCTGAAAGCACGAG           |
| HygFt  | GGCAATTTTCGATGATGCAGC          |
| HygR   | AGCTGCGCCGATGGTTTCTACAA        |
| HygF   | GCGCGTCTGCTGCTCCATACAA         |
| hTubF  | AGCGGTGACAAGTACGTTCC           |
| hTubR  | ACCCTTAGCCCAGTTGTTAC           |
| qTubF  | AGCGGTGACAAGTACGTTCC           |
| qTubR  | ACCCTTAGCCCAGTTGTTAC           |
| q28SF  | TTATAGCCGAGGGTGCAATG           |
| q28SR  | TTTCAAGACGGGTCGCTTAC           |
| qH3F   | AGGCTCCCCGTAAGCAGCTCGC         |
| qH3R   | CGACATGAGGCGGAACCTTACCGG       |
| qMut3F | AGTTGCAGCTGCGTACGATG           |
| qMut3R | ACCAAATTGCCGAGACCACG           |
